# Supplementary material
Source: HighWire-hosted journal article supplement (https://erj.ersjournals.com/content/59/1/2100305)
Supplement: inline-supplementary-material-1 [file inline-supplementary-material-1.pdf]

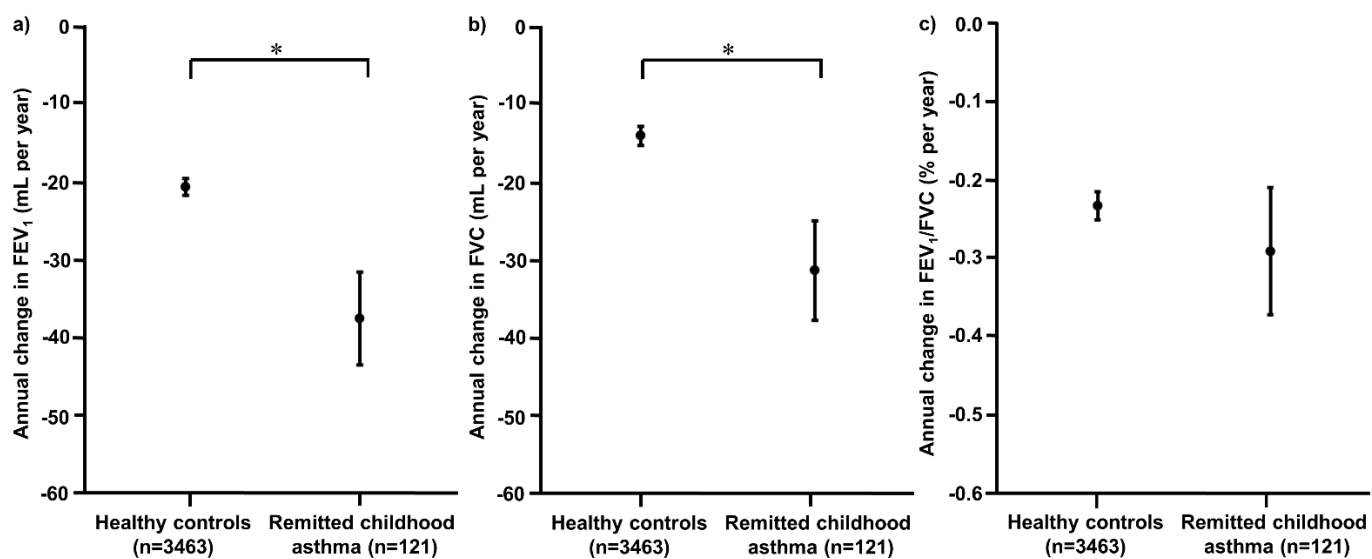

**Supplementary Figure S1.** Comparison of longitudinal changes in a) forced expiratory volume in 1 s (FEV<sub>1</sub>), b) forced vital capacity (FVC) and c) FEV<sub>1</sub>/FVC in the healthy controls and participants with remitted childhood asthma in the whole cohort. Data are presented as mean±SEM. \*: P<0.05.

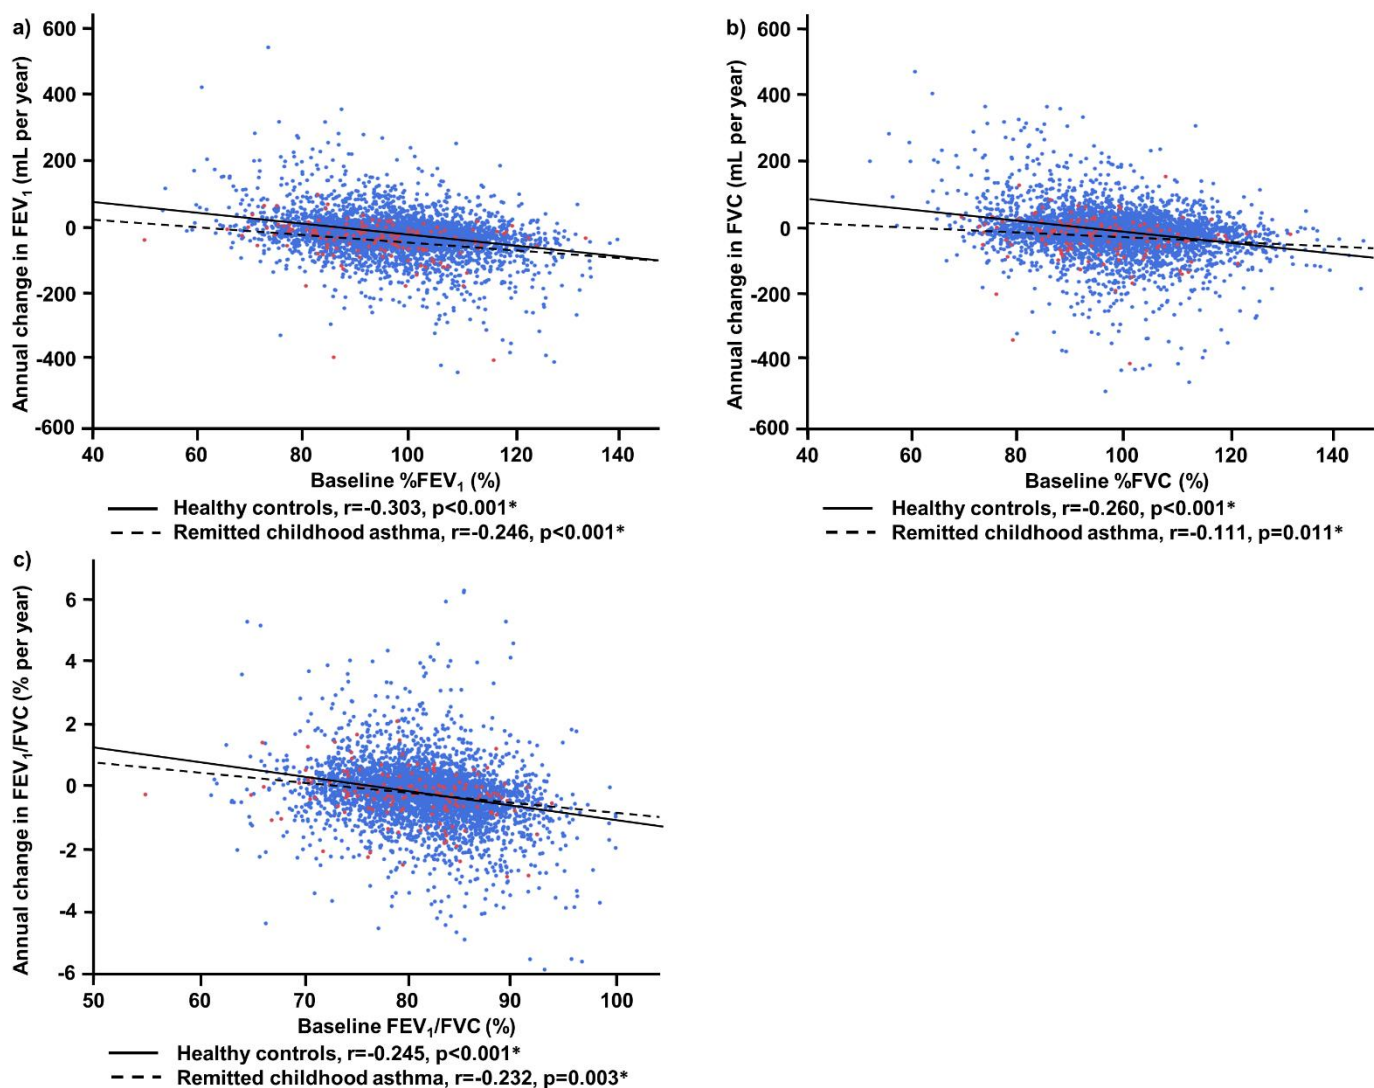

**Supplementary Figure S2.** Relationship between the baseline and longitudinal decline in lung function in participants with remitted childhood asthma and healthy controls, including those with airflow obstruction at the baseline visit ( $n=3932$ ). Blue dots represent healthy controls. Red dots represent participants with remitted childhood asthma. \*:  $P < 0.05$ , Spearman's rank correlation. FEV<sub>1</sub>, forced expiratory volume in 1 s; FVC, forced vital capacity; %FEV<sub>1</sub>, per cent predicted forced expiratory volume in 1 s; %FVC, per cent predicted forced vital capacity.

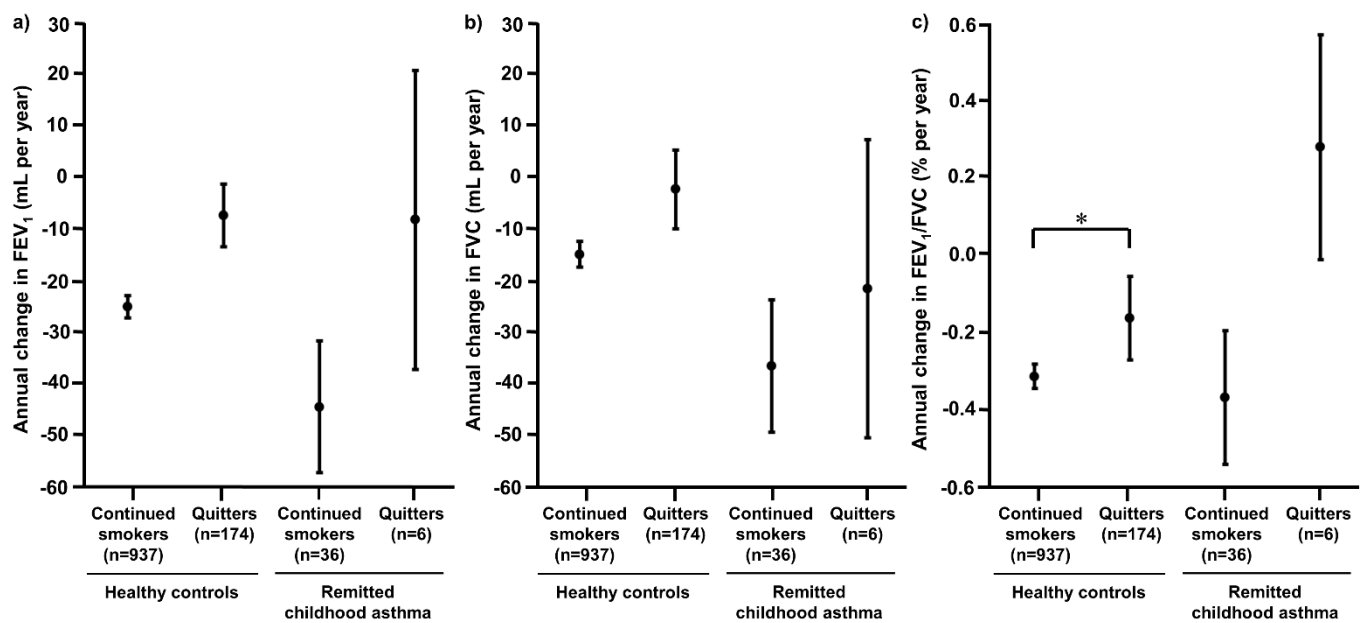

**Supplementary Figure S3.** Longitudinal changes in a) forced expiratory volume in 1 s (FEV<sub>1</sub>), b) forced vital capacity (FVC) and c) FEV<sub>1</sub>/FVC among participants classified as current smokers (sub-grouped as quitters and continued smokers) at the baseline visit. Data are presented as mean  $\pm$  SEM. \*: P < 0.05, Kruskal-Wallis test followed by Steel-Dwass test.

**Supplementary Table S1.** Baseline characteristics of the participants who could be and could not be followed up for at least 2 years

| Characteristics            | Participants $\geq 2$<br>years of follow-up<br>(n=4555) | Participants $< 2$<br>years of follow-up<br>(n=7607) | Standardised<br>differences | <i>p</i> -value |
|----------------------------|---------------------------------------------------------|------------------------------------------------------|-----------------------------|-----------------|
| Male                       | 3799 (83.4)                                             | 5560 (73.1)                                          | 0.252                       | $<0.001^*$      |
| Age (years)                | 48.4 $\pm$ 6.7                                          | 49.7 $\pm$ 8.3                                       | 0.172                       | $<0.001^*$      |
| Height (cm)                | 168.2 $\pm$ 7.4                                         | 166.6 $\pm$ 8.0                                      | 0.208                       | $<0.001^*$      |
| BMI (kg/m <sup>2</sup> )   | 23.5 $\pm$ 3.2                                          | 23.2 $\pm$ 3.3                                       | 0.092                       | $<0.001^*$      |
| Smoking status             |                                                         |                                                      |                             | $<0.001^*$      |
| Never-smoker               | 1835 (40.3)                                             | 3628 (47.7)                                          | 0.149                       |                 |
| Ex-smoker                  | 1385 (30.4)                                             | 2016 (26.5)                                          | 0.087                       |                 |
| Current smoker             | 1335 (29.3)                                             | 1963 (25.8)                                          | 0.078                       |                 |
| Pack-years smoking         | 13.1 $\pm$ 16.1                                         | 12.0 $\pm$ 16.9                                      | 0.067                       | $<0.001^*$      |
| Exposure to dust           | 346 (7.6)                                               | 506 (6.7)                                            | 0.035                       | 0.002*          |
| Cardiac disease            | 89 (2.0)                                                | 119 (1.6)                                            | 0.030                       | 0.101           |
| Respiratory symptoms       |                                                         |                                                      |                             |                 |
| Cough                      | 511 (11.2)                                              | 847 (11.1)                                           | 0.003                       | 0.156           |
| Phlegm                     | 618 (13.6)                                              | 915 (12.0)                                           | 0.048                       | $<0.001^*$      |
| Breathlessness             | 1309 (28.7)                                             | 1925 (25.3)                                          | 0.077                       | $<0.001^*$      |
| Lung function measurements |                                                         |                                                      |                             |                 |
| FEV <sub>1</sub> (L)       | 3.15 $\pm$ 0.61                                         | 3.00 $\pm$ 0.65                                      | 0.238                       | $<0.001^*$      |
| FEV <sub>1</sub> (% pred)  | 97.2 $\pm$ 13.0                                         | 96.7 $\pm$ 13.4                                      | 0.038                       | 0.034*          |
| FVC (L)                    | 3.89 $\pm$ 0.74                                         | 3.67 $\pm$ 0.79                                      | 0.287                       | $<0.001^*$      |
| FVC (% pred)               | 97.7 $\pm$ 12.5                                         | 96.8 $\pm$ 13.0                                      | 0.071                       | $<0.001^*$      |
| FEV <sub>1</sub> /FVC (%)  | 81.2 $\pm$ 6.0                                          | 81.9 $\pm$ 6.6                                       | 0.111                       | $<0.001^*$      |
| Follow-up period (years)   | 5.3 $\pm$ 2.3                                           | 0.2 $\pm$ 0.4                                        | 3.089                       | $<0.001^*$      |

Data are presented as n (%) or mean $\pm$ SD, unless otherwise stated. \*:  $P<0.05$ , chi-square test, Fisher exact test, or Mann-Whitney U-test. BMI, body mass index; FEV<sub>1</sub>, forced expiratory volume in 1 s; FVC, forced vital capacity.

**Supplementary Table S2.** Baseline characteristics of the participants, including those with airflow obstruction at the baseline visit before propensity matching

| Characteristics            | Healthy controls<br>(n=3791) | Remitted childhood<br>asthma (n=141) | Standardised<br>differences | <i>p</i> -value |
|----------------------------|------------------------------|--------------------------------------|-----------------------------|-----------------|
| Male                       | 3139 (82.8)                  | 124 (87.9)                           | 0.145                       | 0.110           |
| Age (years)                | 48.3±6.2                     | 46.3±5.8                             | 0.333                       | <0.001*         |
| Height (cm)                | 168.2±7.4                    | 168.2±7.3                            | 0.000                       | 0.960           |
| BMI (kg/m <sup>2</sup> )   | 23.5±3.2                     | 23.6±3.1                             | 0.032                       | 0.768           |
| Smoking status             |                              |                                      |                             | 0.982           |
| Never-smoker               | 1543 (40.7)                  | 57 (40.4)                            | 0.006                       |                 |
| Ex-smoker                  | 1137 (30.0)                  | 42 (29.8)                            | 0.004                       |                 |
| Current smoker             | 1111 (29.3)                  | 42 (29.8)                            | 0.011                       |                 |
| Pack-years smoking         | 12.9±15.8                    | 12.1±13.3                            | 0.055                       | 0.943           |
| Exposure to dust           | 265 (7.0)                    | 9 (6.4)                              | 0.024                       | 0.626           |
| Cardiac disease            | 63 (1.7)                     | 2 (1.4)                              | 0.024                       | 0.821           |
| Respiratory symptoms       |                              |                                      |                             |                 |
| Cough                      | 361 (9.5)                    | 17 (12.1)                            | 0.084                       | 0.429           |
| Phlegm                     | 452 (11.9)                   | 24 (17.0)                            | 0.145                       | 0.136           |
| Breathlessness             | 1006 (26.5)                  | 38 (27.0)                            | 0.011                       | 0.740           |
| Lung function measurements |                              |                                      |                             |                 |
| FEV <sub>1</sub> (L)       | 3.17±0.60                    | 3.11±0.55                            | 0.104                       | 0.192           |
| FEV <sub>1</sub> (% pred)  | 98.0±12.5                    | 94.2±13.2                            | 0.296                       | <0.001*         |
| FVC (L)                    | 3.90±0.75                    | 3.88±0.67                            | 0.028                       | 0.704           |
| FVC (% pred)               | 98.0±12.4                    | 95.5±12.3                            | 0.202                       | 0.007*          |
| FEV <sub>1</sub> /FVC (%)  | 81.5±5.6                     | 80.3±6.5                             | 0.198                       | 0.045*          |
| Follow-up period (years)   | 5.2±2.3                      | 5.6±2.5                              | 0.167                       | 0.048*          |
| Spirometry tests (n)       | 3.8±1.3                      | 3.9±1.2                              | 0.080                       | 0.142           |

Data are presented as n (%) or mean±SD, unless otherwise stated. \*: P<0.05, chi-square test, Fisher exact test, or Mann-Whitney U-test. BMI, body mass index; FEV<sub>1</sub>, forced expiratory volume in 1 s; FVC, forced vital capacity.

**Supplementary Table S3.** Baseline characteristics of the current smokers, including those with airflow obstruction at the baseline visit, before propensity matching

| Characteristics            | Healthy controls<br>(n=1111) |                    | Standardised<br>differences | <i>p</i> -value | Remitted childhood asthma<br>(n=42) |                  | Standardised<br>differences | <i>p</i> -value |
|----------------------------|------------------------------|--------------------|-----------------------------|-----------------|-------------------------------------|------------------|-----------------------------|-----------------|
|                            | Continued smoker<br>(n=937)  | Quitter<br>(n=174) |                             |                 | Continued smoker<br>(n=36)          | Quitter<br>(n=6) |                             |                 |
| Male                       | 907 (96.8)                   | 164 (94.3)         | 0.121                       | 0.098           | 36 (100.0)                          | 6 (100.0)        | 0.000                       | -               |
| Age (years)                | 47.9±6.0                     | 49.3±5.9           | 0.235                       | 0.004*          | 47.2±4.8                            | 51.5±1.9         | 1.178                       | 0.025*          |
| Height (cm)                | 170.4±6.2                    | 170.5±6.3          | 0.016                       | 0.809           | 170.8±5.6                           | 169.7±4.3        | 0.220                       | 0.615           |
| BMI (kg/m <sup>2</sup> )   | 23.9±3.1                     | 23.5±3.2           | 0.127                       | 0.149           | 23.6±2.8                            | 22.7±1.7         | 0.389                       | 0.350           |
| Pack-years smoking         | 25.7±13.8                    | 25.1±15.8          | 0.040                       | 0.648           | 26.8±9.9                            | 26.2±5.4         | 0.075                       | 0.914           |
| Exposure to dust           | 84 (9.0)                     | 10 (5.7)           | 0.127                       | 0.264           | 1 (2.8)                             | 1 (16.7)         | 0.482                       | 0.100           |
| Cardiac disease            | 7 (0.7)                      | 5 (2.9)            | 0.166                       | 0.013*          | 0 (0.0)                             | 1 (16.7)         | 0.633                       | 0.013*          |
| Respiratory symptoms       |                              |                    |                             |                 |                                     |                  |                             |                 |
| Cough                      | 149 (15.9)                   | 36 (20.7)          | 0.124                       | 0.051           | 9 (25.0)                            | 1 (16.7)         | 0.205                       | 0.950           |
| Phlegm                     | 219 (23.4)                   | 44 (25.3)          | 0.044                       | 0.334           | 10 (27.8)                           | 2 (33.3)         | 0.120                       | 0.602           |
| Breathlessness             | 369 (39.4)                   | 53 (30.5)          | 0.187                       | 0.120           | 16 (44.4)                           | 2 (33.3)         | 0.229                       | 0.768           |
| Lung function measurements |                              |                    |                             |                 |                                     |                  |                             |                 |
| FEV <sub>1</sub> (L)       | 3.26±0.53                    | 3.18±0.55          | 0.148                       | 0.036*          | 3.06±0.51                           | 3.05±0.65        | 0.017                       | 0.369           |
| FEV <sub>1</sub> (% pred)  | 96.0±12.1                    | 94.9±12.9          | 0.088                       | 0.229           | 88.9±12.4                           | 92.2±16.9        | 0.223                       | 0.774           |
| FVC (L)                    | 4.06±0.65                    | 3.93±0.69          | 0.194                       | 0.015*          | 3.89±0.58                           | 3.82±0.70        | 0.109                       | 0.640           |
| FVC (% pred)               | 96.7±11.8                    | 94.9±13.2          | 0.144                       | 0.087           | 91.2±11.4                           | 92.7±14.0        | 0.117                       | 1.000           |
| FEV <sub>1</sub> /FVC (%)  | 80.4±5.3                     | 81.1±5.4           | 0.131                       | 0.271           | 78.9±7.5                            | 79.9±6.3         | 0.144                       | 0.943           |
| Follow-up period (years)   | 5.4±2.4                      | 4.6±1.4            | 0.407                       | 0.001*          | 5.6±2.5                             | 4.6±1.2          | 0.510                       | 0.388           |

|                      |         |         |       |        |         |         |       |       |
|----------------------|---------|---------|-------|--------|---------|---------|-------|-------|
| Spirometry tests (n) | 3.9±1.3 | 3.6±1.3 | 0.231 | 0.002* | 3.7±1.2 | 4.3±1.2 | 0.500 | 0.233 |
|----------------------|---------|---------|-------|--------|---------|---------|-------|-------|

Data are presented as n (%) or mean±SD, unless otherwise stated. \*: P<0.05, chi-square test, Fisher exact test, or Mann-Whitney U-test.

BMI, body mass index; FEV<sub>1</sub>, forced expiratory volume in 1 s; FVC, forced vital capacity.
